# Supplementary material for: Disruption of pyruvate phosphate dikinase in Brucella ovis PA CO2-dependent and independent strains generates attenuation in the mouse model
Source: PubMed Central journal article supplement (PMC7427901; doi:10.1186/s13567-020-00824-7), 2020-08-14
Supplement: 13567_2020_824_MOESM1_ESM.pdf [file 13567_2020_824_MOESM1_ESM.pdf]

| Medium <sup>1</sup>                                                |           |             |                  |                      |
|--------------------------------------------------------------------|-----------|-------------|------------------|----------------------|
| Components                                                         | Gerhardt  | Gerhardt-HS | Gerhardt-HS-meth | Gerhardt-HS-meth-vit |
| <i>Organic macronutrients</i>                                      |           |             |                  |                      |
| Glycerol                                                           | 30.0 g    | 30.0 g      | 30.0 g           | 30.0 g               |
| Lactic acid                                                        | 5.0 g     | 5.0 g       | 5.0 g            | 5.0 g                |
| Glutamic acid                                                      | 1.5 g     | 1.5 g       | 1.5 g            | 1.5 g                |
| <i>Vitamins</i>                                                    |           |             |                  |                      |
| Thiamine                                                           | 0.2 mg    | 0.2 mg      | 0.2 mg           | 0.2 mg               |
| Nicotinic acid                                                     | 0.2 mg    | 0.2 mg      | 0.2 mg           | 0.2 mg               |
| Pantothenic acid                                                   | 0.04 mg   | 0.04 mg     | 0.04 mg          | 0.04 mg              |
| Biotin                                                             | 0.0001 mg | 0.0001 mg   | 0.0001 mg        | 0.0001 mg            |
| Methionine (meth)                                                  | -         | -           | 0.15 g           | 0.15 g               |
| RPMI supplement R7256 (vit)                                        | -         | -           | -                | 10 ml                |
| <i>Minerals</i>                                                    |           |             |                  |                      |
| K <sub>2</sub> HPO <sub>4</sub>                                    | 10.0 g    | 10.0 g      | 10.0 g           | 10.0 g               |
| Na <sub>2</sub> S <sub>2</sub> O <sub>3</sub> · 5 H <sub>2</sub> O | 0.1 g     | 0.1 g       | 0.1 g            | 0.1 g                |
| Mg <sup>2+</sup> (as SO <sub>4</sub> <sup>2-</sup> )               | 10.0 mg   | 10.0 mg     | 10.0 mg          | 10.0 mg              |
| Mn <sup>2+</sup> (as SO <sub>4</sub> <sup>2-</sup> )               | 0.1 mg    | 0.1 mg      | 0.1 mg           | 0.1 mg               |
| Fe <sup>2+</sup> (as SO <sub>4</sub> <sup>2-</sup> )               | 0.1 mg    | 0.1 mg      | 0.1 mg           | 0.1 mg               |
| NaCl                                                               | 7.5 g     | 7.5 g       | 7.5 g            | 7.5 g                |
| <i>Horse serum (HS)</i>                                            | -         | 50 ml       | 50 ml            | 50 ml                |

<sup>1</sup> Amounts per liter of broth
