# Supplementary material for: Disruption of pyruvate phosphate dikinase in Brucella ovis PA CO2-dependent and independent strains generates attenuation in the mouse model
Source: PubMed Central journal article supplement (PMC7427901; doi:10.1186/s13567-020-00824-7), 2020-08-14
Supplement: 13567_2020_824_MOESM2_ESM.pdf [file 13567_2020_824_MOESM2_ESM.pdf]

# A

|                       |                                                                                           |     |
|-----------------------|-------------------------------------------------------------------------------------------|-----|
| <i>A. tumefaciens</i> | MNELGVHNPANGVAELGLGEASRVFYNLNESELYEHAI RNGEAELTIDGALRAV TGQHTG                            | 60  |
| <i>B. ovis</i>        | MKETGIHNKAASISTSGLKELSAVFYNLGAAWLYEETIRRGEAELSAQ GALVARTGQHTG                             | 60  |
| <i>B. abortus</i>     | MKETGIHNKAASISTSGLKELSAVFYNLGPARLYEETIRRGEAELSAQ GALVARTGQHTG                             | 60  |
| <i>B. suis</i>        | MKETGIHNKAASISTSGLKELSAVFYNLGPARLYEETIRRGEAELSAQ GALVARTGQHTG                             | 60  |
| <i>A. tumefaciens</i> | RSPKDKFVVRDASTENTIWWDNNKPLSPENFELLRQDMLAHAAGK TLYVQDLIGGADEEN                             | 120 |
| <i>B. ovis</i>        | RSPKDKFVVRDANTEDHVWWDNNKPMTP EAFELLYAD FIEHAKGRELFVQDLIGGADADN                            | 120 |
| <i>B. abortus</i>     | RSPKDKFVVRDANTEDHVWWDNNKPMTP EAFELLYAD FIEHAKGRELFVQDLIGGADADN                            | 120 |
| <i>B. suis</i>        | RSPKDKFVVRDANTEDHVWWDNNKPMTP EAFELLYAD FIEHAKGRELFVQDLIGGADADN                            | 120 |
| <i>A. tumefaciens</i> | ALPTRVVT ELAWHSLFIRNLLIRPKRETLSGFSQKLT IINLPSFKADPARHGVRSETVIA                            | 180 |
| <i>B. ovis</i>        | KINARVITEYAWHSLFIRNLLIRPSQEALASYVPEMTIIDLPSFKADPERYGVRTETVIA                              | 180 |
| <i>B. abortus</i>     | KINARVITEYAWHSLFIRNLLIRPSQEALASYVPEMTIIDLPSFKADPERYGVRTETVIA                              | 180 |
| <i>B. suis</i>        | KINARVITEYAWHSLFIRNLLIRPSQEALASYVPEMTIIDLPSFKADPERYGVRTETVIA                              | 180 |
| <i>A. tumefaciens</i> | CDLTNGLV L <u>IGGTSYAGE</u> <u>NKKS</u> VFTVLNYLLPAKGVM PMHCSANVGPEGDSAVFF <u>GLSGT</u>   | 240 |
| <i>B. ovis</i>        | VDLTRKIVL <u>IGGTSYAGE</u> <u>MKKS</u> VFTALNYILPAKGVM PMHCSANEGPNGDTAVFF <u>GLSGT</u>    | 240 |
| <i>B. abortus</i>     | VDLTRKIVL <u>IGGTSYAGE</u> <u>MKKS</u> VFTALNYILPAKGVM PMHCSANEGPNGDTAVFF <u>GLSGT</u>    | 240 |
| <i>B. suis</i>        | VDLIRKIVL <u>IGGTSYAGE</u> <u>MKKS</u> VFTALNYILPAKGVM PMHCSANEGPNGDTAVFF <u>GLSGT</u>    | 240 |
| <i>A. tumefaciens</i> | <u>GKT</u> TLSADPARTLIGDDEHGWGEH <u>G</u> I FN F <u>EG</u> GCYAKAIKLSSEAEPEIYAATNRF GTVLE | 300 |
| <i>B. ovis</i>        | <u>GKT</u> TLSADPTRLIGDDEHGWGEH <u>G</u> V FN F <u>EG</u> GCYAKTIRLSAEAEPEIYATTQRF GTVLE  | 300 |
| <i>B. abortus</i>     | <u>GKT</u> TLSADPTRLIGDDEHGWGEH <u>G</u> V FN F <u>EG</u> GCYAKTIRLSAEAEPEIYATTQRF GTVLE  | 300 |
| <i>B. suis</i>        | <u>GKT</u> TLSADPTRLIGDDEHGWGEH <u>G</u> V FN F <u>EG</u> GCYAKTIRLSAEAEPEIYATTQRF GTVLE  | 300 |
| <i>A. tumefaciens</i> | NVVLDES RVPDFNDNSLTENTRSAYPLHFIPNASETGIAGHPKT <u>IIML</u> TADAFGVLPPIA                    | 360 |
| <i>B. ovis</i>        | NVVL DENRQPDFDDGSLTENTRCAYPLDFIPNASKSGKGGQPKN <u>IIML</u> TADAFGVMPPIA                    | 360 |
| <i>B. abortus</i>     | NVVL DENRQPDFDDGSLTENTRCAYPLGFIPNASKSGKGGQPKN <u>IIML</u> TADAFGVMPPIA                    | 360 |
| <i>B. suis</i>        | NVVL DENRQPDFDDGSLTENTRCAYPLDFIPNASKSGKGGQPKN <u>IIML</u> TADAFGVMPPIA                    | 360 |
| <i>A. tumefaciens</i> | RLTPEQAMYHFLSGYTAKVAGTEKGVTEPEATFSTCFGAPFMPRHPAEYGNLLRELIGKH                              | 420 |
| <i>B. ovis</i>        | KLTPAQAMYHFLSGYTAKVAGTEKGVTEPEATFSTCFGAPFMPRHPSEYGNLLRKLIA <b>ST</b>                      | 420 |
| <i>B. abortus</i>     | KLTPAQAMYHFLSGYTAKVAGTEKGVTEPEATFSTCFGAPFMPRHPSEYGNLLRKLIAEH                              | 420 |
| <i>B. suis</i>        | KLTPAQAMYHFLSGYTAKVAGTEKGVTEPEATFSTCFGAPFMPRHPSEYGNLLRKLIAEH                              | 420 |
| <i>A. tumefaciens</i> | G-VDCWL VNTGWTGG---AYGIGKRMP IKATRALLTAALTGDLKNAQFR TDANFGFAVPL                           | 476 |
| <i>B. ovis</i>        | <b>RLIAGWSIPAGRAALTALASGCRSRQPAR</b> ----- <b>FWQRPSTAR</b> ----                          | 458 |
| <i>B. abortus</i>     | KV-DCWL VNTGWTGG---AYGVGKRMP IKATRALLAAALDGS LNNAEFRIDPNFGFAVPV                           | 476 |
| <i>B. suis</i>        | KV-DCWL VNTGWTGG---AYGVGKRMP IKATRALLAAALDGS LNNAEFRIDPNFGFAVPV                           | 476 |
| <i>A. tumefaciens</i> | SLDGV DGA ILDRPSTWADGAAYDAQAKKLVSMFVSNFTK FEDHVDSKVRDAAPGLLLAAE                           | 536 |
| <i>B. ovis</i>        | -----                                                                                     | 458 |
| <i>B. abortus</i>     | EVPGV ESSI LDRPST-----                                                                    | 491 |
| <i>B. suis</i>        | EVPGV ESSI LDRPSTWADKVAYDAQAKKLVDMFVSNFEKFESHVDHEVKDAAPAIRMAAE                            | 536 |

# B

|                   |                                                                  |     |
|-------------------|------------------------------------------------------------------|-----|
| <i>B. ovis</i>    | MAKWVYTFGDGKAEGAASDRNLLGGKGANLAEMSSLGLPVPPGFITITTEVCTYYYNNDRV    | 60  |
| <i>B. abortus</i> | MAKWVYTFGDGKAEGAASDRNLLGGKGANLAEMSSLGLPVPPGFITITTEVCTYYYNNDRV    | 60  |
| <i>B. suis</i>    | MAKWVYTFGDGKAEGAASDRNLLGGKGANLAEMSSLGLPVPPGFITITTEVCTYYYNNDRV    | 60  |
| <i>B. ovis</i>    | YPSELDAQVQAALAHIAATLTGRNFGDAEKPLLVSVRSGARASMPGMMDTVNLGLNDETV     | 120 |
| <i>B. abortus</i> | YPSELDAQVQAALAHIAATLTGRNFGDAEKPLLVSVRSGARASMPGMMDTVNLGLNDETV     | 120 |
| <i>B. suis</i>    | YPSELDAQVQAALAHIAATLTGRNFGDAEKPLLVSVRSGARASMPGMMDTVNLGLNDETV     | 120 |
| <i>B. ovis</i>    | QAIARESGDERFAYDSYRRFIQMYSDVVLGVDHGFFEEILEDTKADLGVEVDTALSVDW      | 180 |
| <i>B. abortus</i> | QAIARESGDERFAYDSYRRFIQMYSDVVLGVDHGFFEEILEDTKADLGVEVDTALSADDW     | 180 |
| <i>B. suis</i>    | QAIARESGDERFAYDSYRRFIQMYSDVVLGVDHGFFEEILEDTKADLGVEVDTALSADDW     | 180 |
| <i>B. ovis</i>    | KNVIGLYKAKVEEELGQFPQDPREQLWGAIGAVFSSWMNARAI TYRRLHNI PAAWGTAV    | 240 |
| <i>B. abortus</i> | KNVIGLYKAKVEEELGQFPQDPREQLWGAIGAVFSSWMNARAI TYRRLHNI PAAWGTAV    | 240 |
| <i>B. suis</i>    | KNVIGLYKAKVEEELGQFPQDPREQLWGAIGAVFSSWMNARAI TYRRLHNI PAAWGTAV    | 240 |
| <i>B. ovis</i>    | NVQAMVFGNMGETSATGVAFTRNPSTGENKLYGEFLVNAQGEDVVAGIRTPQNI TEEARI    | 300 |
| <i>B. abortus</i> | NVQAMVFGNMGETSATGVAFTRNPSTGENKLYGEFLVNAQGEDVVAGIRTPQNI TEEARI    | 300 |
| <i>B. suis</i>    | NVQAMVFGNMGETSATGVAFTRNPSTGENKLYGEFLVNAQGEDVVAGIRTPQNI TEEARI    | 300 |
| <i>B. ovis</i>    | AAGSDKPSLEKEMPEAFAEFLKVANRLEQHYRDMQDLEFTIERGKLWMLQTRSGKRTARA     | 360 |
| <i>B. abortus</i> | AAGSDKPSLEKVMPEAFAEFLKVANRLEQHYRDMQDLEFTIERGKLWMLQTRSGKRTARA     | 360 |
| <i>B. suis</i>    | AAGSDKPSLEKVMPEAFAEFLKVANRLEQHYRDMQDLEFTIERGKLWMLQTRSGKRTARA     | 360 |
| <i>B. ovis</i>    | ALKMAVEMAAEGLISEEEAVLRIDPAALDQLLHPTIDPRAERQVVMGLPASPGAATGEI      | 420 |
| <i>B. abortus</i> | ALKMAVEMAAEGLISEEEAVLRIDPAALDQLLHPTIDPRAERQVVMGLPASPGAATGEI      | 420 |
| <i>B. suis</i>    | ALKMAVEMAAEGLISEEEAVLRIDPAALDQLLHPTIDPRAERQVVMGLPASPGAATGEI      | 420 |
| <i>B. ovis</i>    | VFSSEEAQAKAEGRNVLIVRIETSPEDIHGMHAAEGILTRGGMTSHAAVVARGMGKPC       | 480 |
| <i>B. abortus</i> | VFSSEEAQAKAEGRNVLIVRIETSPEDIHGMHAAEGILTRGGMTSHAAVVARGMGKPC       | 480 |
| <i>B. suis</i>    | VFSSEEAQAKAEGRNVLIVRIETSPEDIHGMHAAEGILTRGGMTSHAAVVARGMGKPC       | 480 |
| <i>B. ovis</i>    | VSGAGSLRVDYRNGTMLAAGQTRFKGDVITIDGASGQVLKGSVAMLQPELSGDFGKLEW      | 540 |
| <i>B. abortus</i> | VSGAGSLRVDYRNGTMLAAGQTRFKGDVITIDGASGQVLKGSVAMLQPELSGDFGKLEW      | 540 |
| <i>B. suis</i>    | VSGAGSLRVDYRNGTMLAAGQTRFKGDVITIDGASGQVLKGSVAMLQPELSGDFGKLEW      | 540 |
| <i>B. ovis</i>    | ADRARRMKVRANAETPADARTARSFGAEGIGLCRTEHMFFDGSRIVAMREMILSDTEEGR     | 600 |
| <i>B. abortus</i> | ADRARRMKVRANAETPADARTARSFGAEGIGLCRTEHMFFDGSRIVAMREMILSDTEEGR     | 600 |
| <i>B. suis</i>    | ADRARRMKVRANAETPADARTARSFGAEGIGLCRTEHMFFDGSRIVAMREMILSDTEEGR     | 600 |
| <i>B. ovis</i>    | RLALAKLLPMQRSDFAELEIMKGLPVTIRLLDPLHEFLPHTDDEEVDEVARSMGVDAAK      | 660 |
| <i>B. abortus</i> | RLALGKLLPMQRSDFAELEIMKGLPVTIRLLDPLHEFLPHTDDEEVDEVARSMGVDAAK      | 660 |
| <i>B. suis</i>    | RLALAKLLPMQRSDFAELEIMKGLPVTIRLLDPLHEFLPHTDDEEVDEVARSMGVDAAK      | 660 |
| <i>B. ovis</i>    | LRDRADALHEFNPLGHRGCR LAVSYPEIAEMQARAI FEA AVEAGKKTGEPVVPVPEVMVPL | 720 |
| <i>B. abortus</i> | LRDRADALHEFNPLGHRGCR LAVSYPEIAEMQARAI FEA AVEAGKKTGEPVVPVPEVMVPL | 720 |
| <i>B. suis</i>    | LRDRADALHEFNPLGHRGCR LAVSYPEIAEMQARAI FEA AVEAGKKTGEPVVPVPEVMVPL | 720 |
| <i>B. ovis</i>    | VGLKAELDFVKARIDAVAKEVMSEAGIKIDYMGVTMIELPRAALRAAEIAESAEFFSFGT     | 780 |
| <i>B. abortus</i> | VGLKAELDFVKARIDAVAKEVMSEAGIKIDYMGVTMIELPRAALRAAEIAESAEFFSFGT     | 780 |
| <i>B. suis</i>    | VGLKAELDFVKARIDAVAKEVMSEAGIKIDYMGVTMIELPRAALRAAEIAESAEFFSFGT     | 780 |
| <i>B. ovis</i>    | NDLTQTTFGISRDDAAGFLT TYQNRGVIEQDPFVSLDVG V GELVQIAAERGRKTRKIK    | 840 |
| <i>B. abortus</i> | NDLTQTTFGISRDDAAGFLT TYQNRGVIEQDPFVSLDVG V GELVQIAAERGRKTRKIK    | 840 |
| <i>B. suis</i>    | NDLTQTTFGISRDDAAGFLT TYQNRGVIEQDPFVSLDVG V GELVQIAAERGRKTRKIK    | 840 |
| <i>B. ovis</i>    | LGICGEHGGDPASIAFY EKTGLDYVSCSPFRVPIARLAAAQA AVRKV 887            |     |
| <i>B. abortus</i> | LGICGEHGGDPASIAFCEKTGLDYVSCSPFRVPIARLAAAQA AVRKV 887             |     |
| <i>B. suis</i>    | LGICGEHGGDPASIAFCEKTGLDYVSCSPFRVPIARLAAAQA AVRKV 887             |     |
